# Supplementary material for: Controlling the degradation of cellulose scaffolds with Malaprade oxidation for tissue engineering
Source: Royal Society of Chemistry journal article supplement (doi:10.1039/d0tb01015d), 2020-01-01
Supplement: d0tb01015d1.pdf [file d0tb01015d1.pdf]

Supplementary information for

# Controlling the degradation of cellulose scaffolds with Malaprade oxidation for tissue engineering

*Wichchulada Chimpibul<sup>a,b</sup>, Tadashi Nakaji-Hirabayashi<sup>c</sup>, Xida Yuan<sup>b</sup>, Kazuaki*

*Matsumura<sup>\*b</sup>*

<sup>a</sup>Program in Biotechnology, Faculty of Science, Chulalongkorn University, Bangkok, Thailand

<sup>b</sup>School of Materials Science, Japan Advanced Institute of Science and Technology, Ishikawa, Japan

<sup>c</sup>Faculty of Engineering Department of Environmental Applied Chemistry, University of Toyama, Toyama, Japan

\*Corresponding Author: Kazuaki Matsumura, School of Materials Science, Japan Advanced Institute of Science and Technology, Ishikawa, Japan; e-mail:

[mkazuaki@jaist.ac.jp](mailto:mkazuaki@jaist.ac.jp)

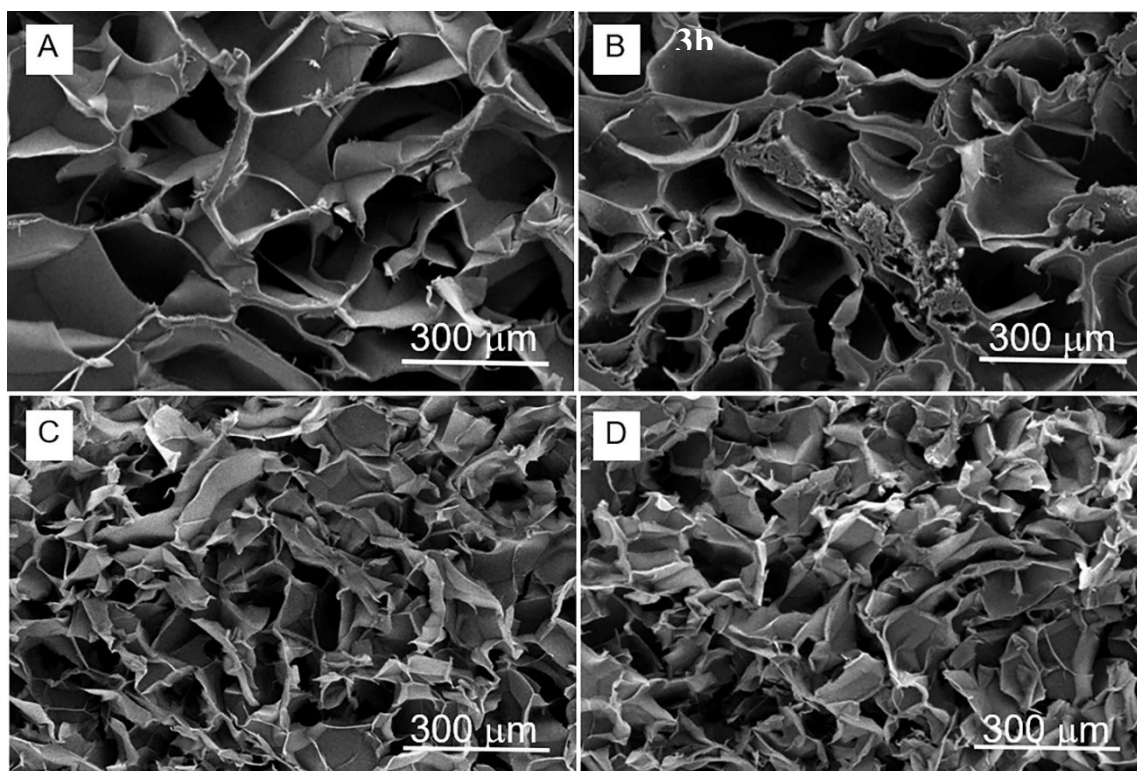

**Figure S1.** SEM photographs of the cellulose scaffold structure after leaching. The scaffolds contained different percentages of NaCl particles with a size of 250  $\mu\text{m}$ : (A) 60%, (B) 50%, (C) 40%, and (D) 30%.

**Table S1** Pore size of cellulose scaffolds prepared using 50 wt% of NaCl crystals as porogens.

| NaCl particle size/ $\mu\text{m}$ | Pore size before oxidation / $\mu\text{m}$ | Pore size after oxidation by $\text{NaIO}_4$ (1.0%)/ $\mu\text{m}$ |
|-----------------------------------|--------------------------------------------|--------------------------------------------------------------------|
| 52                                | 54 $\pm$ 4.8                               | 58 $\pm$ 9.9                                                       |
| 75                                | 84 $\pm$ 5.5                               | 79 $\pm$ 10.6                                                      |
| 100                               | 124 $\pm$ 11.3                             | 131 $\pm$ 20.8                                                     |
| 150                               | 210 $\pm$ 23.5                             | 199 $\pm$ 12.6                                                     |
| 250                               | 248 $\pm$ 21.0                             | 266 $\pm$ 31.5                                                     |

**Table S2** Pore size of cellulose scaffolds prepared using 30, 40, 50, 60 wt% of NaCl crystals with a size of 250  $\mu\text{m}$  as porogens.

| NaCl particle (250 $\mu\text{m}$ size) concentration/wt% | Pore size before oxidation / $\mu\text{m}$ |
|----------------------------------------------------------|--------------------------------------------|
| 30                                                       | 122 $\pm$ 25.6                             |
| 40                                                       | 188 $\pm$ 17.3                             |
| 50                                                       | 248 $\pm$ 21.0                             |
| 60                                                       | 283 $\pm$ 32.6                             |

**Table S3** Porosity of cellulose scaffolds

|              |                                           | NaCl particle (250 $\mu\text{m}$ size) concentration / wt% |                |                |                |
|--------------|-------------------------------------------|------------------------------------------------------------|----------------|----------------|----------------|
|              |                                           | 30                                                         | 40             | 50             | 60             |
| Porosity / % | Before oxidation                          | 54.2 $\pm$ 3.3                                             | 59.2 $\pm$ 1.6 | 68.4 $\pm$ 2.3 | 70.2 $\pm$ 1.9 |
|              | After oxidation by $\text{NaIO}_4$ (1.0%) | 55.4 $\pm$ 4.5                                             | 60.2 $\pm$ 2.9 | 69.9 $\pm$ 3.7 | 73.5 $\pm$ 6.3 |

**Table S4.** Aldehyde introduction to cellulose scaffolds.

| % NaIO <sub>4</sub> introduced to cellulose scaffold | mmol aldehyde/weight (mmol/g) | % aldehyde introduction /glucose unit |
|------------------------------------------------------|-------------------------------|---------------------------------------|
| 0.1                                                  | 0.056                         | 0.91±0.04                             |
| 0.2                                                  | 0.080                         | 1.30±0.02                             |
| 0.3                                                  | 0.117                         | 1.90±0.28                             |
| 0.5                                                  | 0.346                         | 5.61±0.48                             |
| 1.0                                                  | 0.640                         | 10.4±1.75                             |
| 2.5                                                  | 0.913                         | 14.8±2.98                             |
| 5.0                                                  | 1.34                          | 21.7±1.02                             |
| 10.0                                                 | 2.06                          | 33.4±3.88                             |
| 15.0                                                 | 2.33                          | 37.7±3.56                             |
| 20.0                                                 | 2.67                          | 43.3±5.32                             |



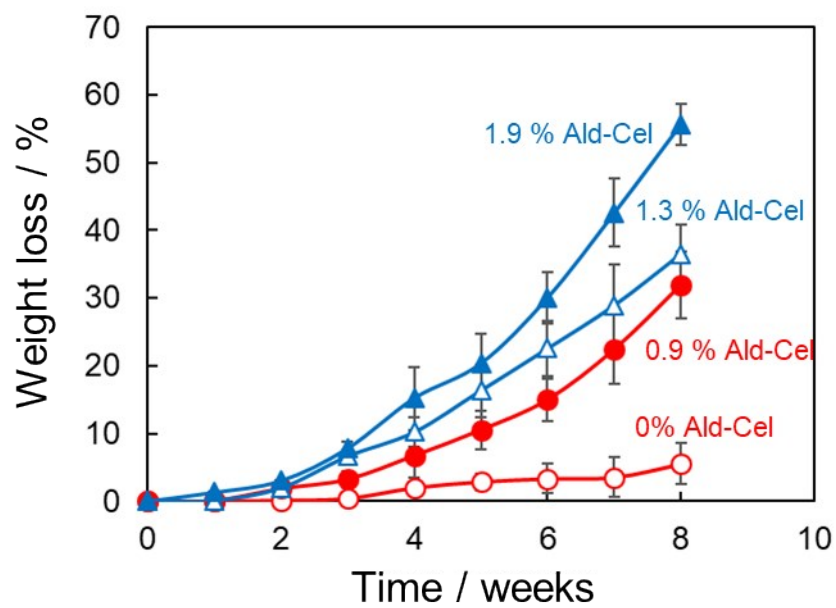

**Figure S2.** Ald-Cel scaffold degradation in 5% glycine solution over a period of 8 weeks.

Data represent mean  $\pm$  standard deviation (N = 3).

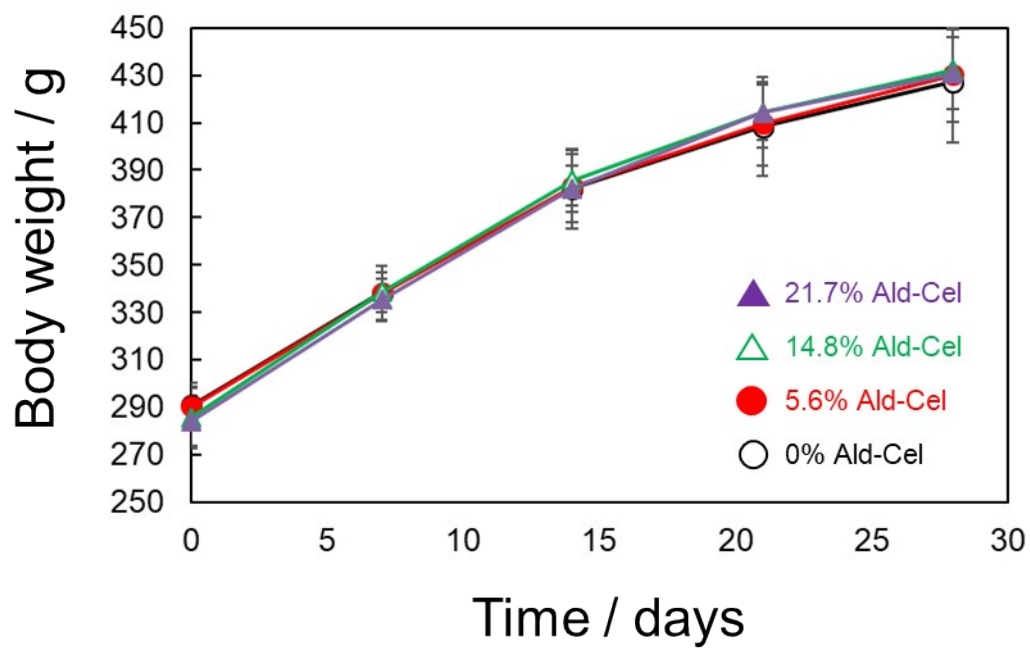

**Figure S3.** Changes in body weight of rats after implantation. The error bars indicate SD (N = 6).
